1 **Marine fish intestine responds to ocean acidification**  
2 **producing more carbonate aggregates**

3

4

5

6 Sílvia F. Gregório, Ignacio Ruiz-Jarabo, Edison M Carvalho and Juan Fuentes \*

7

8

9

10

11 Centre of Marine Sciences (CCMar), Universidade do Algarve, Campus de  
12 Gambelas, 8005-139 Faro, Portugal

13

14

15

16

17 Short title: Fish intestinal response to acidification

18 Keywords: osmoregulation, sea bream, bicarbonate secretion and CO<sub>2</sub>

19

20

21 \* Author for correspondence:

22 Juan Fuentes ([jfuentes@ualg.pt](mailto:jfuentes@ualg.pt))

23 Centre of Marine Sciences (CCMar)

24 Universidade do Algarve

25 Campus de Gambelas,

26 8005-139 Faro, Portugal

27 Tel: 00351289800900 x 7375

28

29

30 **ABSTRACT:**

31 Marine fish contribute to the carbon cycle by producing mineralized intestinal  
32 aggregates generated as by-products of their osmoregulation. Here we aimed at  
33 characterizing the control of intestinal aggregate production in the gilthead sea  
34 bream in response to near future increases of environmental CO<sub>2</sub>. Our results  
35 demonstrate that hypercapnia (800 and 1200 μatm CO<sub>2</sub>) elicits higher intestine  
36 epithelial HCO<sub>3</sub><sup>-</sup> secretion and the subsequent parallel increase of intestinal  
37 aggregate production when compared to present values (400 μatm CO<sub>2</sub>). Intestinal  
38 gene expression analysis revealed the up-regulation of crucial transport mechanisms  
39 involved not only in the intestinal secretion cascade (*Slc4a4*, *Slc26a3* and *Slc26a6*)  
40 of sea bream, but also in other mechanisms involved in intestinal ion uptake linked to  
41 water absorption such as *NKCC2* and the *Aquaporin 1b*. These results highlight the  
42 important role of fish in the marine carbon cycle, and their potential growing impact  
43 of intestinal biomineralization processes in the scenario of ocean acidification.

44

## 45 INTRODUCTION:

46 In seawater, fish live in a hyperosmotic environment which leads to a loss of body  
47 fluids. The water lost passively through the epithelial surface is compensated by  
48 drinking (Fuentes and Eddy, 1997; Smith et al., 1930). Due to the osmotic imbalance  
49 between the ingested SW and the internal body fluids, an intense desalinization in  
50 the first part of the digestive tract is required i. e. oesophagus and stomach (Hirano  
51 and Mayer-Gostan, 1976; Parmelee and Renfro, 1983). This ion capture, mainly  $\text{Na}^+$   
52 and  $\text{Cl}^-$ , results in the decrease of intestinal fluid osmolality from circa 1050 to 400  
53  $\text{mOsm kg}^{-1}$  due to the action of active and passive transport processes (Esbaugh  
54 and Grosell, 2014; Loretz, 1995; Marquez and Fuentes, 2014). The osmotic pressure  
55 of the intestinal fluid is then decreased to a level that matches plasma osmolality  
56 (Gregorio et al., 2013), allowing the water to be absorbed passively or by the action  
57 of aquaporins (Whittamore, 2012; Wood and Grosell, 2012).

58 Water absorption in the anterior part of the intestine of marine fish was associated to  
59 ion fluxes driven by  $\text{Na}^+/\text{K}^+/\text{2Cl}^-$  co-transporters (Musch et al., 1982). However, it was  
60 recently established that part of the process is also linked to the action of chloride-  
61 dependent movements coupled to bicarbonate secretion, and mediated by apical  
62 anion transporters (Grosell et al., 2005; Heuer et al., 2012). Members of the Slc26  
63 family are responsible for this apical mechanism in fish enterocytes (Carvalho et al.,  
64 2015; Gregorio et al., 2013; Ruhr et al., 2016).  $\text{HCO}_3^-$  enters the cell through a  
65 basolateral  $\text{Na}^+/\text{HCO}_3^-$  co-transporter belonging to the Slc4 family (Chang et al.,  
66 2012) or is formed by the intracellular action of carbonic anhydrases that hydrate the  
67  $\text{CO}_2$  resulting in the production of  $\text{HCO}_3^-$  and  $\text{H}^+$  ions (Grosell et al., 2009).

68 The secretion of  $\text{HCO}_3^-$  into the intestinal luminal fluid promotes an increase of pH  
69 (Wilson and Grosell, 2003). In parallel calcium and magnesium are present in high  
70 concentrations in SW and accumulate in the intestinal fluid. Under both conditions,  
71 precipitation and formation of carbonate aggregates in the intestinal lumen of marine  
72 fish is promoted. As a result of this process, an osmolality reduction of the fluid  
73 occurs, thus facilitating water absorption (Wilson et al., 2009; Wilson et al., 2002).  
74 Apical bicarbonate secretion in the enterocyte is regulated by biotic factors such as  
75 hormones, peptides, blood  $\text{HCO}_3^-$  concentration and abiotic factors e.g. salinity  
76 (Genz and Grosell, 2011; Genz et al., 2008; Gregorio et al., 2013). On the other  
77 hand, previous studies demonstrated that bicarbonate secretion in the intestine of  
78 marine fish is also regulated by an intracellular  $\text{pH}/\text{CO}_2/\text{HCO}_3^-$  sensor, the soluble

79 adenylyl cyclase (Carvalho et al., 2012; Tresguerres et al., 2010). Moreover, a  
80 challenge with high environmental levels of CO<sub>2</sub> (hypercapnia) elicited a response in  
81 the gilthead sea bream (*Sparus aurata*), decreasing its plasma pH during the initial  
82 24 h, which is then buffered by increased levels of plasma bicarbonate (Michaelidis  
83 et al., 2007). Such an accumulation of bicarbonate in plasma, but also in other body  
84 fluids was also observed in several organisms (Portner et al., 2004). It should be of  
85 interest to establish if those physiological modifications alter intestinal carbonate  
86 aggregates production in marine fish.

87 In a global scenario, as a result of anthropogenic emissions in the atmosphere CO<sub>2</sub>  
88 increased from 280 up to 380  $\mu\text{atm}$  in the 20<sup>th</sup> century. The ocean absorbs part of  
89 this CO<sub>2</sub> resulting in a decrease of pH (IPCC, 2007; Kroeker et al., 2013). The ocean  
90 surface CO<sub>2</sub> levels are predicted to duplicate by the year 2100 to achieve levels circa  
91 800  $\mu\text{atm}$  CO<sub>2</sub>, thus decreasing 0.3-0.4 pH units (Orr et al., 2005). Previous studies  
92 have reported that some marine calcifying biota is affected when submitted to  
93 elevated CO<sub>2</sub> levels and the subsequent pH decrease close to values expected by  
94 the year 2100 (pH 7.8) and by the end of the next century (pH 7.6) (Mackenzie et al.,  
95 2014; Munday et al., 2009; Munday et al., 2010). Moreover, by the year 2300 the  
96 seawater CO<sub>2</sub> concentration will be 1900  $\mu\text{atm}$  that in turn decreased the pH in up to  
97 0.77 units (Caldeira and Wickett, 2003; Kroeker et al., 2013; Zeebe et al., 2008). In  
98 contrast to other taxa, marine fish contribute to the carbon cycle as they fix/cycle  
99 around 15 % of the oceanic carbon, producing mineralized intestinal aggregates  
100 generated as by-products of their osmoregulation (Walsh et al., 1991; Wilson et al.,  
101 2009). The nature of those aggregates makes them relevant as they provide  
102 neutralizing alkaline buffer in the form of soluble carbonates, preferentially in the  
103 uppermost, most productive section of the water column (Perry et al., 2011). This  
104 study aimed at understanding the intestinal response and control of aggregate  
105 production of marine fish intestine in response to near future concentrations of CO<sub>2</sub>  
106 in seawater.

107

108

## 109 **METHODS**

### 110 ***Animals***

111 Sea bream (*Sparus aurata*) juveniles were purchased from CUPIMAR SA (Cadiz,  
112 Spain) and transported to Ramalhete Marine Station (CCMAR, University of Algarve,

113 Faro, Portugal). Fish were maintained for 60 days in 1000 L tanks with running  
114 seawater at a density 9-10 kg m<sup>-3</sup> and fed 2 % ration (fish wet weight, Sorgal, S.A.,  
115 Portugal; Balance 3) twice daily until the start of the experiment. For experimental  
116 purposes 5 fish (200 g body weight) were transferred to 100 L tanks. Eight replicates  
117 were established per CO<sub>2</sub> concentration in an open circuit where temperature was  
118 maintained constant (25 °C), photoperiod was natural (April-June, Algarve, Portugal)  
119 and the feeding regime was maintained as above. Food was withheld for 36 h before  
120 sacrifice and sampling. No mortality was observed during the experiments.

121 The experiments comply with the guidelines of the European Union Council  
122 (86/609/EU). All fish protocols were performed under a “Group-C” licence from the  
123 Direcção-Geral de Veterinária, Ministério da Agricultura, do Desenvolvimento Rural  
124 e das Pescas, Portugal.

125

### 126 ***Experimental conditions and seawater chemistry***

127 The rate of CO<sub>2</sub> injection into the systems was controlled by the pH level of seawater  
128 using pH probes connected to CO<sub>2</sub> controllers (EXAxt PH450G; Yokogawa Iberia-  
129 Portugal) with an internal controller following guidelines provided by the  
130 manufacturer. Each independent circuit was injected with CO<sub>2</sub>, thus obtaining three  
131 groups constantly maintained at 400, 800 and 1200 µatm CO<sub>2</sub>. To calibrate the  
132 automated negative feedback system, it was necessary to measure seawater pH,  
133 and extrapolate a pH/pCO<sub>2</sub> standard curve to indirectly measure pCO<sub>2</sub>. The linearity  
134 of the relationship was confirmed through IRGA CO<sub>2</sub> analysis (WMA-4 PP Systems,  
135 Amesbury, MA, USA).

136 Total alkalinity (TA) was measured using an automated, open-cell potentiometric  
137 titration unit (SOP 3b) (Dickson et al., 2007), with a combination DL15 titrator and a  
138 DG115-SC probe (Mettler-Toledo) using certified acid titrant (0.1 M HCl, Fluka  
139 Analytical, Sigma-Aldrich). The results are expressed as µmol kg<sup>-1</sup> seawater. The  
140 water chemistry parameters were calculated using the CO<sub>2</sub>Calc Software (Robbins  
141 et al., 2010). Along with temperature and salinity, CO<sub>2</sub>Calc algorithms produce a  
142 suite of carbonate system parameters using only two measured variables (of five  
143 potential inputs); the remaining three possible inputs are also calculated as algorithm  
144 outputs. In our samples, pH, TA, and/or TCO<sub>2</sub> were routinely measured, and  
145 precedence of use is: 1) measured pH and TA 2) measured pH and TCO<sub>2</sub> (total  
146 dissolved inorganic carbon). In situ carbonate system parameters were also

147 calculated using temperature recorded in the field (“adjusted” outputs), as explained  
148 before (Robbins et al., 2010).

149

### 150 ***General sampling***

151 After 3 months of acclimation to the altered water CO<sub>2</sub> levels, fish were captured and  
152 anesthetized in 2-phenoxyethanol (1: 10,000 v/v; Sigma- Aldrich, St Louis, MO,  
153 USA). Blood samples were collected by caudal puncture using heparinized syringes.  
154 Plasma was obtained by centrifugation (10,000 rpm, 5 min, 4 °C) and stored at  
155 -20 °C until analysis. Fish were sacrificed by decapitation and the whole intestine  
156 was isolated. The intestinal fluid of individual fish was collected from the excised  
157 intestinal tract clamped (from pyloric caeca to anal sphincter) with two haemostatic  
158 forceps, emptied into pre-weighed vials and centrifuged (12,000 rpm, 5 min, RT) to  
159 separate fluid from precipitates. The fluid was transferred to pre-weighed vials and  
160 the volume was measured to the nearest 0.1 µL (0.1 mg, assuming a density of 1).

161

### 162 ***Plasma and fluid analysis***

163 Osmolality of plasma and intestinal luminal fluid was measured in 10 µL samples  
164 with a Vapro 5520 osmometer (Wescor, South Logan, UT, USA). Sodium  
165 concentrations were measured by flame photometry (BWB-XP Performance Plus,  
166 BWB Technologies, UK). The results are expressed as mmol L<sup>-1</sup>. Chloride was  
167 determined by Coulomb-metric titration (SAT-500, DKK-TOA, Japan). Calcium and  
168 magnesium were measured by colorimetric tests, using commercial kits (Spinreact,  
169 Reactivos Spinreact, SA, Girona, Spain), according to the manufacturer instruction in  
170 a microplate reader (Biorad Benchmark, Bio-Rad, USA). Intestinal fluid titratable  
171 alkalinity (HCO<sub>3</sub><sup>-</sup> + CO<sub>3</sub><sup>2-</sup>) was manually measured with the double titration method  
172 with a pH electrode (HI1330B, Hanna Instruments, Smithfield, RI, USA) attached to a  
173 pH meter (PHM84, Radiometer, Copenhagen, Denmark): 50 µL of the intestinal  
174 fluid samples was diluted in 10 mL NaCl (40 mmol L<sup>-1</sup>), gassed with CO<sub>2</sub>-free gas  
175 for 30 min to remove CO<sub>2</sub> and titrated to pH 3.8 with 10 mmol L<sup>-1</sup> HCl; an  
176 additional gassing period of 20 min was applied to remove any remaining CO<sub>2</sub>. The  
177 sample was back titrated to its original pH with 10 mmol L<sup>-1</sup> NaOH. The volume  
178 difference between added acid and base in both titrations and titrant molarities was  
179 used to calculate total HCO<sub>3</sub><sup>-</sup> equivalents (mEquiv.L<sup>-1</sup>) as described before  
180 (Gregorio et al., 2014).

## 181 **Intestinal Bicarbonate Secretion**

182 A segment of fish anterior intestine was excised, mounted on tissue holders (P2413,  
183  $0.71 \text{ cm}^2$ , Physiologic Instruments, San Diego, CA, USA) and positioned between  
184 two half-chambers (P2400, Physiologic Instruments) containing 1.5 mL of basolateral  
185 and apical saline. The composition of the basolateral saline was:  $160 \text{ mmol L}^{-1} \text{ NaCl}$ ,  
186  $1 \text{ mmol L}^{-1} \text{ MgSO}_4$ ,  $2 \text{ mmol L}^{-1} \text{ NaH}_2\text{PO}_4$ ,  $1.5 \text{ mmol L}^{-1} \text{ CaCl}_2$ ,  $5 \text{ mmol L}^{-1} \text{ NaHCO}_3$ ,  
187  $3 \text{ mmol L}^{-1} \text{ KCl}$ ,  $5.5 \text{ mmol L}^{-1}$  glucose and  $5 \text{ mmol L}^{-1}$  HEPES, pH 7.800, gassed  
188 with 0.3%  $\text{CO}_2$ + 99.7%  $\text{O}_2$ . Apical saline:  $88 \text{ mmol L}^{-1} \text{ NaCl}$ ,  $9.5 \text{ mmol L}^{-1} \text{ MgCl}_2$ ,  $3$   
189  $\text{mmol L}^{-1} \text{ KCl}$ ,  $7.5 \text{ mmol L}^{-1} \text{ CaCl}_2$ ,  $126.5 \text{ mmol L}^{-1} \text{ MgSO}_4$  and  $1 \text{ mmol L}^{-1} \text{ Na}_2\text{HPO}_4$ ,  
190 gassed with 100%  $\text{O}_2$  and pH maintained at 7.800 throughout the experiments by  
191 pH-Stat (see below). The temperature was maintained at  $25 \text{ }^\circ\text{C}$  throughout all  
192 experiments. All bioelectrical variables were monitored by means of Ag/AgCl  
193 electrodes (with tip asymmetry  $<1 \text{ mV}$ ) connected to either side of the Ussing  
194 chamber with 3 mm- bore agar bridges ( $1 \text{ mol L}^{-1} \text{ KCl}$  in 3% agar). Transepithelial  
195 electrical potential (TEP, mV) was monitored by clamping of epithelia to  $0 \text{ } \mu\text{A cm}^{-2}$ .  
196 Epithelial resistance ( $R_t$ ,  $\Omega \text{ cm}^2$ ) was manually calculated (Ohm's law) using the  
197 voltage deflections induced by a  $10 \text{ } \mu\text{A cm}^{-2}$  bilateral pulse of 2 s every minute.  
198 Current injections were performed by means of a VCC 600 amplifiers (Physiologic  
199 Instruments). For pH-Stat control, a pH electrode (PHC 4000-8, Radiometer) and a  
200 microburette tip were immersed in the luminal saline and connected to a pH-Stat  
201 system (TIM 854, Radiometer). To allow pulsing (for  $R_t$  calculation) during pH  
202 measurements, the amplifier was grounded to the titration unit. The configuration of  
203 amplifier/pH-Stat system used in this study is similar to that first established for the  
204 characterization of  $\text{HCO}_3^-$  secretion in the intestine of the Gulf toadfish and sea  
205 bream (Gregorio et al., 2013; Grosell and Genz, 2006; Guffey et al., 2011; Taylor et  
206 al., 2010) and provides rates of intestinal secretion similar to those obtained by the  
207 double titration method in the intestine of the sea bream (Fuentes et al., 2010).  
208 Measurement of  $\text{HCO}_3^-$  secretion was performed on luminal saline at physiological  
209 pH 7.800 during all experiments. The volume of the acid titrant ( $2.5 \text{ mmol L}^{-1} \text{ HCl}$ )  
210 was recorded and the amount of  $\text{HCO}_3^-$  secreted ( $\text{nmol h}^{-1} \text{ cm}^{-2}$ ) was calculated  
211 from the volume of titrant added, the concentration of the titrant and the surface area  
212 ( $\text{cm}^2$ ). All experiments comprised 1 h of tissue stable voltage and  $\text{HCO}_3^-$  secretion.

213

214

## 215 **qPCR**

216 After anaesthesia and decapitation, a portion of the anterior intestine was collected  
217 from individual fish, and stored in RNA Later at 4 °C (Sigma- Aldrich) until utilized for  
218 RNA extraction within 2 weeks. Total RNA was extracted from samples of anterior  
219 intestine with the Total RNA Kit I (E.Z.N.A, Omega, US) following the manufacturer's  
220 instructions and the quantity and quality of RNA assessed (Nanodrop 1000, Thermo  
221 Scientific, US). Prior to cDNA synthesis RNA was treated with DNase using the  
222 DNA-free Kit (Ambion, UK) following the supplier's instructions. Reverse transcription  
223 of RNA into cDNA was carried out using the RevertAid First Strand cDNA Synthesis  
224 Kit (TermoFisher Scientific, UK) with 500 ng of total RNA in a reaction volume of 20  
225  $\mu$ L. Table 4 shows primer sequences and amplicon sizes.

226 Real-time qPCR amplifications were performed in duplicate in a final volume of 10  
227  $\mu$ L with 5  $\mu$ L SsoFast EvaGreen Supermix (Bio-Rad, UK) as the reporter dye, around  
228 20 ng cDNA, and 0.3  $\mu$ M of each forward and reverse primers. Amplifications were  
229 performed in 96-well plates using the *One-step Plus* sequence detection system  
230 (Applied Biosystems, California, USA) with the following protocol: denaturation and  
231 enzyme activation step at 95 °C for 2 min, followed by 40 cycles. After the  
232 amplification phase, a temperature-determining dissociation step was carried out at  
233 65 °C for 15 s, and 95 °C for 15 s. For normalization of cDNA loading, all samples  
234 were run in parallel using 18S ribosomal RNA (18S). To estimate efficiencies, a  
235 standard curve was generated for each primer pair from 10-fold serial dilutions (from  
236 0.1 to  $1e10^{-8}$  ng) of a pool of first-stranded cDNA template from all samples.  
237 Standard curves represented the cycle threshold value as a function of the logarithm  
238 of the number of copies generated, defined arbitrarily as one copy for the most  
239 diluted standard. All calibration curves exhibited correlation coefficients  $R^2 > 0.98$ , and  
240 the corresponding real-time PCR efficiencies between 95 and 99%.

241

## 242 **Statistics**

243 All results are shown as mean  $\pm$  standard error of the mean (mean  $\pm$  s.e.m.). After  
244 assessing homogeneity of variance and normality, statistical analysis of the data was  
245 carried out by using one-way analysis of variance using CO<sub>2</sub> concentration as a  
246 factor of variance, followed by the *post hoc* Bonferroni t-test (Prism 5.0, GraphPad  
247 Software for McIntosh). The level of significance was set at  $p < 0.05$ .



248 **RESULTS:**

249 No mortality was observed in any of the experimental groups.

250 ***Experimental conditions - seawater chemistry***

251 The environmental condition values were controlled twice a day in this study and the  
252 results are shown in Table 1. Temperature and salinity levels were maintained within  
253 a small range of variation, and no differences were described between CO<sub>2</sub>  
254 treatments (Table 1). The concentration of CO<sub>2</sub> and pH in the control treatment  
255 averaged 408 ± 20 µatm and pH 8.01 ± 0.01, in the medium CO<sub>2</sub>-concentration  
256 group 797 ± 29 µatm and pH 7.80 ± 0.01, whereas in the enriched-CO<sub>2</sub> treatment it  
257 averaged 1259 ± 46 µatm and pH 7.64 ± 0.01. Total alkalinity was not significantly  
258 different between treatments ranging between 2582 and 2605 µmol kg<sup>-1</sup> SW (Table  
259 1).

260

261 ***Plasma and intestinal fluid analysis***

262 The osmolality and the ion composition of plasma and intestinal fluid of sea bream  
263 are shown in Table 2 and 3, respectively. No differences were detected in plasma  
264 osmolality which ranged between 343 to 346 mOsm kg<sup>-1</sup> in controls and fish exposed  
265 to elevated CO<sub>2</sub> concentrations (Table 2). Additionally, no changes in Cl<sup>-</sup> (163.5 to  
266 165.3 mmol L<sup>-1</sup>) and Na<sup>+</sup> (178.7 to 186.2 mmol L<sup>-1</sup>) concentration (Table 2) were  
267 observed in the plasma between controls and fish exposed to elevated water CO<sub>2</sub>.

268 The content of Ca<sup>2+</sup> (9.5 ± 0.6 mmol L<sup>-1</sup>) in intestinal fluid did not change with the  
269 different exposure to elevated water CO<sub>2</sub> (Table 3) and the concentration of Na<sup>+</sup>  
270 (72.1 to 81.8 mmol L<sup>-1</sup>) in the intestinal fluid was not different between controls and  
271 fish exposed to elevated CO<sub>2</sub> (Table 3). The content of Cl<sup>-</sup> in the intestinal fluid of  
272 fish exposed to both levels of elevated water CO<sub>2</sub> was significantly lower 95.0 ± 5.3  
273 mmol L<sup>-1</sup> (*p*<0.05, one-way ANOVA) when compared to controls 116 ± 5.5 mmol L<sup>-1</sup>  
274 (Figure 1A). However, the content of Mg<sup>2+</sup> in the intestinal fluid of fish exposed to  
275 elevated water CO<sub>2</sub> was statistically higher than in control fish (*p*<0.05, one-way  
276 ANOVA, Table 3).

277

278 ***Bicarbonate and carbonate aggregates in the intestinal lumen***

279 HCO<sub>3</sub><sup>-</sup> concentration in the intestinal fluid of control fish was in the range of 44 mEq  
280 L<sup>-1</sup> (Figure 1B) and the exposure to both levels of elevated CO<sub>2</sub> resulted in a  
281 significant (*p*<0.05, one-way ANOVA) increase of HCO<sub>3</sub><sup>-</sup> concentration in the fish

282 intestinal fluid to 66 and 65 mEq L<sup>-1</sup> respectively (Figure 1B). When bicarbonate  
283 content was normalized to fluid volume plus the weight of carbonate aggregates  
284 (Ca[Mg]CO<sub>3</sub>) and fish body mass, we still observed that fish exposed to both levels  
285 of elevated CO<sub>2</sub> responded with a 3-fold increase in carbonate aggregate formation  
286 ( $p < 0.05$ , one-way ANOVA, Figure 1C).

287

### 288 **Bicarbonate secretion**

289 HCO<sub>3</sub><sup>-</sup> secretion in the anterior intestine is shown in Figure 2A. In control fish (400  
290  $\mu$ atm CO<sub>2</sub>) bicarbonate secretion was  $511 \pm 7.3$  nmol.h<sup>-1</sup>.cm<sup>-2</sup>, while it averaged  $631$   
291  $\pm 7.2$  and  $842 \pm 6.9$  nmol.h<sup>-1</sup>.cm<sup>-2</sup> for fish acclimated to 800 and 1200  $\mu$ atm CO<sub>2</sub>,  
292 respectively. No significant effects were observed in bicarbonate secretion between  
293 the 400 and 800  $\mu$ atm CO<sub>2</sub> groups, while the 1200  $\mu$ atm CO<sub>2</sub>-group was significantly  
294 higher than the control fish. In terms of epithelial resistance, no changes were  
295 observed between groups (Figure 2B).

296

### 297 **qPCR**

298 The *Slc26a3* anion exchanger paralleled the accumulation of carbonate aggregates  
299 with a significant gradual increase of *Slc26a3* expression in response to increased  
300 water CO<sub>2</sub> (Figure 3A). The apical exchanger *Slc26a6* presents a significantly  
301 ( $p < 0.05$ , one-way ANOVA) higher expression in fish exposed to high water CO<sub>2</sub>  
302 levels compared to controls (Figure 3B).

303 Changes in *SLC4a4* expression are shown in Fig. 3C. Expression of the basolateral  
304 co-transporter *SLC4a4* was significantly ( $p < 0.05$ , one-way ANOVA) higher in fish  
305 exposed to medium and high CO<sub>2</sub> levels than in control fish (Figure 3E).

306 The expression of *NKCC2*, the absorptive form of the co-transporter in the anterior  
307 intestine of sea bream was significantly increased in response to hypercapnia  
308 (Figure 4A)

309 As expected, the water channel *Aquaporin 1b* also responded positively to the CO<sub>2</sub>  
310 challenge, with significantly higher expression of *Aquaporin 1b* gene in fish exposed  
311 to medium and high CO<sub>2</sub> concentrations than in controls (Figure 4B).

312

313

314

315

316 **DISCUSSION:**

317 The sea bream, acclimated from 400 up to 1200  $\mu\text{atm CO}_2$  for three months, is able  
318 to maintain within a narrow range its plasma levels of osmolality,  $\text{Na}^+$  and  $\text{Cl}^-$  without  
319 suffering any casualties. This homeostatic balance is partially achieved by changes  
320 in intestinal epithelia related to ion transport. In this regard, elevated water  $\text{CO}_2$   
321 induces increased rates of epithelial  $\text{HCO}_3^-$  secretion and a molecular response that  
322 is in keeping with enhanced water absorption processes.

323 Gilthead sea bream acclimated to elevated water  $\text{CO}_2$  for 3 months increased the  
324 amount of  $\text{HCO}_3^-$  and carbonate aggregates in the intestinal fluid (Figure 1). More  
325 precisely the groups of fish acclimated to hypercapnia (800 and 1200  $\mu\text{atm CO}_2$ ),  
326 when compared to the control group (400  $\mu\text{atm CO}_2$ ), showed a 1.5-fold and 3.0-fold  
327 increase in the bicarbonate and carbonate aggregates present in the intestinal lumen,  
328 respectively. These results and the fold-change of variation are in good agreement,  
329 with those previously described by us in seawater-acclimated sea bream challenged  
330 with 55ppt salinity (Gregorio et al., 2013). These effects in relation to salinity  
331 challenge, were related to an increase in water processing at the level of enterocytes.  
332 An enrichment of the intestinal fluid with  $\text{Mg}^{2+}$  and other divalent ions was described  
333 reflecting high levels of water ingestion and processing in the intestine (Kurita et al.,  
334 2008; Whittamore, 2012). Here, a noticeable increase of  $\text{Mg}^{2+}$  the intestinal fluid in  
335 response to hypercapnia is exposed, which suggests different water processing  
336 and/or drinking rates in response to higher water  $\text{CO}_2$ .

337 In the intestinal fluid, both levels of hypercapnia elicited significant decreases in the  
338 intestinal fluid  $\text{Cl}^-$  content of about 21 mM. Interestingly, this decrease was paralleled  
339 by a  $\sim 22$  mM increase in  $\text{HCO}_3^-$  content of the same fluid, pointing to an activation of  
340  $\text{Cl}^-/\text{HCO}_3^-$  exchangers at the epithelial level (Grosell, 2006). To test this possibility,  
341 we measured bicarbonate secretion in the anterior intestine, since this portion of the  
342 intestine shows the highest secretion rates along the intestinal tract in the sea bream  
343 (Carvalho et al., 2012; Gregorio et al., 2013). Accordingly, intestinal bicarbonate  
344 secretion increased in parallel with increased environmental  $\text{CO}_2$  levels (Figure 2).  
345 The measured bicarbonate secretion fold-change between the control group and fish  
346 challenged with 1200  $\mu\text{atm CO}_2$  from 511 to 842  $\text{nmol HCO}_3^- \text{cm}^{-2} \text{h}^{-1}$ , coincided well  
347 with the alterations reported in the intestine of the sea bream challenged long term  
348 with 55 ppt seawater, from 495 to 783  $\text{nmol HCO}_3^- \text{cm}^{-2} \text{h}^{-1}$  (Gregorio et al., 2013). In  
349 this sense, the effects of hypercapnia could be carefully compared to a hyperosmotic

350 challenge in this species, as they both enhanced bicarbonate secretion and  
351 formation of carbonate aggregates in the intestine.

352 It was previously reported that the seabream responds to hypercapnia with a plasma  
353 pH drop, which is buffered within the first 5 days of exposure by increasing plasma  
354 bicarbonate levels (Michaelidis et al., 2007). We hereby postulated that the  
355 accumulation of plasma bicarbonate generated in response to high environmental  
356 CO<sub>2</sub>, could be levelled off by activation of intestinal bicarbonate secretion at the level  
357 of the enterocytes. Plasma bicarbonate enters the enterocyte through an  
358 electrogenic Na<sup>+</sup>-coupled HCO<sub>3</sub><sup>-</sup> transporter located at the basolateral membrane,  
359 Slc4a4, which is important for a transepithelial HCO<sub>3</sub><sup>-</sup> transport (Kurita et al., 2008;  
360 Taylor et al., 2010). Our results show that the expression of *Slc4a4* increased in the  
361 groups challenged with high CO<sub>2</sub> levels, supporting a hypothesis for enhanced  
362 bicarbonate secretion capacity in the intestine, in response to water hypercapnia and  
363 the consequent plasma HCO<sub>3</sub><sup>-</sup> accumulation.

364 In the apical membrane of the fish enterocytes, both bicarbonate secretion and  
365 chloride uptake are mediated through Slc26 family transporters, such as the Slc26a3  
366 and Slc26a6 (Grosell et al., 2005; Kurita et al., 2008; Wilson et al., 1996). Likewise  
367 those exchangers are expressed in the intestine of sea bream and are modulated by  
368 salinity and endocrine regulation (Gregorio et al., 2014; Gregorio et al., 2013). In  
369 addition, the expression of this transporter is modulated in response to a CO<sub>2</sub>  
370 challenge in the gill of toadfish (Esbaugh et al., 2012). Here, we confirmed that the  
371 expression of *Slc26a6* and *Slc26a3* are also modulated positively in response to  
372 elevated water CO<sub>2</sub> levels in the intestine of the sea bream (Figure 3). This increase  
373 is in good agreement with the parallel expression increase of the *Slc4a4* co-  
374 transporter, which would substantiate a boosted secretory flow of bicarbonate from  
375 the plasma to the intestinal lumen, subsequently enhancing chloride absorption. It is  
376 challenging to establish transporters stoichiometry from ion concentration alone.  
377 However, here we have established a 1:1 relationship between the variation of Cl<sup>-</sup>  
378 and HCO<sub>3</sub><sup>-</sup> in the intestinal fluid after 3 months in hypercapnia (Figures 1A and B). It  
379 appears, that as a consequence of the increased bicarbonate levels on the intestinal  
380 fluid, carbonate aggregate formation is increased, sustaining a decrease of fluid  
381 osmolality and that enables water absorption (Wilson et al., 2002).

382 In marine fish, water absorption in the intestinal tract is mediated through the activity  
383 of ion absorption, especially Cl<sup>-</sup>. One of the most important ion transporters in this

384 species is the  $\text{Na}^+\text{-K}^+\text{-2Cl}^-$  co-transporter (NKCC) (Musch et al., 1982), which  
385 mediates the electroneutral movement of 1  $\text{Na}^+$ , 1  $\text{K}^+$  and 2  $\text{Cl}^-$  across cell  
386 membranes. Two isoforms, *NKCC1* and *NKCC2*, are currently known and are  
387 encoded by different genes (Flatman, 2002). In the intestine of marine fish the apical  
388 co-transporter NKCC2 activity seems essential for ion regulation and, in parallel with  
389 the *Slc26a6*, it is believed to regulate water homeostasis in salinity-challenged sea  
390 bream (Gregorio et al., 2013; Grosell, 2006). Here, we show that elevated water  $\text{CO}_2$   
391 causes an upregulation of *NKCC2* expression in the anterior intestine (Figure 4A)  
392 which adds up to increased expression of the apical anion transporters, *Slc26a6* and  
393 *Slc26a3*. This combination has the potential to enhance intestinal water absorption  
394 linked to chloride movements. Remarkably, sea bream exposed to elevated water  
395  $\text{CO}_2$  showed no significant changes in plasma ions concentration, indicating that the  
396 intestinal response to elevated water  $\text{CO}_2$  is part of the allostatic control of plasma  
397 homeostasis. In order to understand these changes further, we analysed the  
398 expression of *Aquaporin 1b*, a functional water channel highly expressed in intestinal  
399 epithelial cells of the sea bream anterior intestine (Martos-Sittha et al., 2015; Raldua  
400 et al., 2008). We observed solid increases of *Aquaporin 1b* expression in the anterior  
401 intestine of sea bream exposed to elevated water  $\text{CO}_2$ . Providing further evidence of  
402 the functional and molecular changes of the intestine in response to elevated water  
403  $\text{CO}_2$ , that could be the foundation of increased energetic expenditure recently  
404 reported in the toadfish intestine in response to elevated water  $\text{CO}_2$  (Heuer and  
405 Grosell, 2016).

406

## 407 **ACKNOWLEDGEMENTS**

408 We appreciate the technical input of Dr. João Eugenio Reis (Ramalhete Marine  
409 Station, CCMar, University of Algarve, Portugal) for fish care and assistance during  
410 experimental periods.

411

## 412 **FUNDING**

413 This work was partially supported by the Ministry of Science and Higher Education  
414 and European Social Funds through the Portuguese National Science Foundation  
415 (FCT) by studentship SFRH/BD/113363/2015 to SG and by Project PTDC/MAR-  
416 BIO/3034/2014 to JF. CCMar is supported by national funds from the Portuguese  
417 Foundation for Science and Technology (FCT) through project UID/Multi/04326/2013.

418

419

## 420 **REFERENCES**

421 **Caldeira, K. and Wickett, M. E.** (2003). Oceanography: anthropogenic carbon  
422 and ocean pH. *Nature* **425**, 365.

423 **Carvalho, E. S., Gregorio, S. F., Canario, A. V., Power, D. M. and Fuentes, J.**  
424 (2015). PTHrP regulates water absorption and aquaporin expression in the intestine of  
425 the marine sea bream (*Sparus aurata*, L.). *Gen Comp Endocrinol* **213**, 24-31.

426 **Carvalho, E. S., Gregorio, S. F., Power, D. M., Canario, A. V. and Fuentes, J.**  
427 (2012). Water absorption and bicarbonate secretion in the intestine of the sea bream  
428 are regulated by transmembrane and soluble adenylyl cyclase stimulation. *J Comp*  
429 *Physiol B* **182**, 1069-80.

430 **Chang, M. H., Plata, C., Kurita, Y., Kato, A., Hirose, S. and Romero, M. F.** (2012).  
431 Euryhaline pufferfish NBCe1 differs from nonmarine species NBCe1 physiology. *Am J*  
432 *Physiol Cell Physiol* **302**, C1083-95.

433 **Dickson, A. G., Sabine, C. L. and Christen, J. R.** (2007). Guide to best practice for  
434 ocean CO<sub>2</sub> measurements. Sidney, Canada: North Pacific Marine Science Organization.

435 **Esbaugh, A. J. and Grosell, M.** (2014). Esophageal desalination is mediated by  
436 Na(+), H(+) exchanger-2 in the gulf toadfish (*Opsanus beta*). *Comp Biochem Physiol A Mol*  
437 *Integr Physiol* **171**, 57-63.

438 **Esbaugh, A. J., Heuer, R. and Grosell, M.** (2012). Impacts of ocean acidification  
439 on respiratory gas exchange and acid-base balance in a marine teleost, *Opsanus beta*. *J*  
440 *Comp Physiol B* **182**, 921-34.

441 **Flatman, P. W.** (2002). Regulation of Na-K-2Cl cotransport by phosphorylation  
442 and protein-protein interactions. *Biochim Biophys Acta* **1566**, 140-51.

443 **Fuentes, J. and Eddy, F. B.** (1997). Drinking in freshwater, euryhaline and  
444 marine teleosts. In *Ionic regulation in animals*, eds. N. Hazon F. B. Eddy and G. Flik), pp.  
445 135-149. New York: Heidelberg: Springer-Verlag.

446 **Fuentes, J., Power, D. M. and Canario, A. V.** (2010). Parathyroid hormone-  
447 related protein-stanniocalcin antagonism in regulation of bicarbonate secretion and  
448 calcium precipitation in a marine fish intestine. *Am J Physiol Regul Integr Comp Physiol*  
449 **299**, R150-8.

- 450 **Genz, J. and Grosell, M.** (2011). *Fundulus heteroclitus* acutely transferred from  
451 seawater to high salinity require few adjustments to intestinal transport associated  
452 with osmoregulation. *Comp Biochem Physiol A Mol Integr Physiol* **160**, 156-65.
- 453 **Genz, J., Taylor, J. R. and Grosell, M.** (2008). Effects of salinity on intestinal  
454 bicarbonate secretion and compensatory regulation of acid-base balance in *Opsanus*  
455 *beta*. *J Exp Biol* **211**, 2327-35.
- 456 **Gregorio, S. F., Carvalho, E. S., Campinho, M. A., Power, D. M., Canario, A. V.**  
457 **and Fuentes, J.** (2014). Endocrine regulation of carbonate precipitate formation in  
458 marine fish intestine by stanniocalcin and PTHrP. *J Exp Biol* **217**, 1555-62.
- 459 **Gregorio, S. F., Carvalho, E. S., Encarnacao, S., Wilson, J. M., Power, D. M.,**  
460 **Canario, A. V. and Fuentes, J.** (2013). Adaptation to different salinities exposes  
461 functional specialization in the intestine of the sea bream (*Sparus aurata* L.). *J Exp Biol*  
462 **216**, 470-479.
- 463 **Grosell, M.** (2006). Intestinal anion exchange in marine fish osmoregulation. *J*  
464 *Exp Biol* **209**, 2813-27.
- 465 **Grosell, M. and Genz, J.** (2006). Ouabain-sensitive bicarbonate secretion and  
466 acid absorption by the marine teleost fish intestine play a role in osmoregulation. *Am J*  
467 *Physiol Regul Integr Comp Physiol* **291**, R1145-56.
- 468 **Grosell, M., Genz, J., Taylor, J. R., Perry, S. F. and Gilmour, K. M.** (2009). The  
469 involvement of H<sup>+</sup>-ATPase and carbonic anhydrase in intestinal HCO<sub>3</sub><sup>-</sup> secretion in  
470 seawater-acclimated rainbow trout. *J Exp Biol* **212**, 1940-8.
- 471 **Grosell, M., Wood, C. M., Wilson, R. W., Bury, N. R., Hogstrand, C., Rankin, C.**  
472 **and Jensen, F. B.** (2005). Bicarbonate secretion plays a role in chloride and water  
473 absorption of the European flounder intestine. *Am J Physiol Regul Integr Comp Physiol*  
474 **288**, R936-46.
- 475 **Guffey, S., Esbaugh, A. and Grosell, M.** (2011). Regulation of apical H<sup>(+)</sup>-  
476 ATPase activity and intestinal HCO<sub>3</sub><sup>(-)</sup> secretion in marine fish osmoregulation. *Am J*  
477 *Physiol Regul Integr Comp Physiol* **301**, R1682-91.
- 478 **Heuer, R. M., Esbaugh, A. J. and Grosell, M.** (2012). Ocean acidification leads to  
479 counterproductive intestinal base loss in the gulf toadfish (*Opsanus beta*). *Physiol*  
480 *Biochem Zool* **85**, 450-9.
- 481 **Heuer, R. M. and Grosell, M.** (2016). Elevated CO<sub>2</sub> increases energetic cost and  
482 ion movement in the marine fish intestine. *Sci Rep* **6**, 34480.
- 483 **Hirano, T. and Mayer-Gostan, N.** (1976). Eel esophagus as an osmoregulatory  
484 organ. *Proc Natl Acad Sci U S A* **73**, 1348-50.
- 485 **IPCC.** (2007). Contribution of Working Groups I, II and III to the Fourth  
486 Assessment Report of the Intergovernmental Panel on Climate Change. Geneva,  
487 Switzerland.
- 488 **Kroeker, K. J., Kordas, R. L., Crim, R., Hendriks, I. E., Ramajo, L., Singh, G. S.,**  
489 **Duarte, C. M. and Gattuso, J. P.** (2013). Impacts of ocean acidification on marine  
490 organisms: quantifying sensitivities and interaction with warming. *Global change*  
491 *biology* **19**, 1884-96.
- 492 **Kurita, Y., Nakada, T., Kato, A., Doi, H., Mistry, A. C., Chang, M. H., Romero, M.**  
493 **F. and Hirose, S.** (2008). Identification of intestinal bicarbonate transporters involved  
494 in formation of carbonate precipitates to stimulate water absorption in marine teleost  
495 fish. *American Journal of Physiology-Regulatory Integrative and Comparative Physiology*  
496 **294**, R1402-R1412.

- 497 **Loretz, C. A.** (1995). Electrophysiology of ion transport in teleost intestinal cells.  
498 In *Cellular and molecular approaches to fish ionic regulation*, vol. 14 eds. C. M. Wood and  
499 T. J. Shuttleworth), pp. 25-56. Amsterdam: Academic Press.
- 500 **Mackenzie, C. L., Lynch, S. A., Culloty, S. C. and Malham, S. K.** (2014). Future  
501 oceanic warming and acidification alter immune response and disease status in a  
502 commercial shellfish species, *Mytilus edulis* L. *PLoS One* **9**, e99712.
- 503 **Marquez, L. and Fuentes, J.** (2014). In vitro characterization of acid secretion in  
504 the gilthead sea bream (*Sparus aurata*) stomach. *Comp Biochem Physiol A Mol Integr*  
505 *Physiol* **167**, 52-8.
- 506 **Martos-Sitcha, J. A., Campinho, M. A., Mancera, J. M., Martinez-Rodriguez, G.**  
507 **and Fuentes, J.** (2015). Vasotocin and isotocin regulate aquaporin 1 function in the sea  
508 bream. *J Exp Biol* **218**, 684-93.
- 509 **Michaelidis, B., Spring, A. and Portner, H. O.** (2007). Effects of long-term  
510 acclimation to environmental hypercapnia on extracellular acid-base status and  
511 metabolic capacity in Mediterranean fish *Sparus aurata*. *Marine Biology* **150**, 1417-1429.
- 512 **Munday, P. L., Dixon, D. L., Donelson, J. M., Jones, G. P., Pratchett, M. S.,**  
513 **Devitsina, G. V. and Doving, K. B.** (2009). Ocean acidification impairs olfactory  
514 discrimination and homing ability of a marine fish. *Proc Natl Acad Sci U S A* **106**, 1848-  
515 52.
- 516 **Munday, P. L., Dixon, D. L., McCormick, M. I., Meekan, M., Ferrari, M. C. and**  
517 **Chivers, D. P.** (2010). Replenishment of fish populations is threatened by ocean  
518 acidification. *Proc Natl Acad Sci U S A* **107**, 12930-4.
- 519 **Musch, M. W., Orellana, S. A., Kimberg, L. S., Field, M., Halm, D. R., Krasny, E.**  
520 **J., Jr. and Frizzell, R. A.** (1982). Na<sup>+</sup>-K<sup>+</sup>-Cl<sup>-</sup> co-transport in the intestine of a marine  
521 teleost. *Nature* **300**, 351-3.
- 522 **Orr, J. C., Fabry, V. J., Aumont, O., Bopp, L., Doney, S. C., Feely, R. A.,**  
523 **Gnanadesikan, A., Gruber, N., Ishida, A., Joos, F. et al.** (2005). Anthropogenic ocean  
524 acidification over the twenty-first century and its impact on calcifying organisms.  
525 *Nature* **437**, 681-6.
- 526 **Parmelee, J. T. and Renfro, J. L.** (1983). Esophageal desalination of seawater in  
527 flounder: role of active sodium transport. *Am J Physiol* **245**, R888-93.
- 528 **Perry, C. T., Salter, M. A., Harborne, A. R., Crowley, S. F., Jelks, H. L. and**  
529 **Wilson, R. W.** (2011). Fish as major carbonate mud producers and missing components  
530 of the tropical carbonate factory. *Proceedings of the National Academy of Sciences of the*  
531 *United States of America* **108**, 3865-3869.
- 532 **Portner, H. O., Langenbuch, M. and Reipschlager, A.** (2004). Biological impact  
533 of elevated ocean CO<sub>2</sub> concentrations: Lessons from animal physiology and earth  
534 history. *Journal of Oceanography* **60**, 705-718.
- 535 **Raldua, D., Otero, D., Fabra, M. and Cerda, J.** (2008). Differential localization  
536 and regulation of two aquaporin-1 homologs in the intestinal epithelia of the marine  
537 teleost *Sparus aurata*. *American journal of physiology. Regulatory, integrative and*  
538 *comparative physiology* **294**, R993-1003.
- 539 **Robbins, L. L., Hansen, M. E., Kleypas, A. and Meylan, S. C.** (2010). CO<sub>2</sub>calc: a  
540 user-friendly seawater carbon calculator for Windows, Mac OS X, and iOS (iPhone), pp.  
541 17: U.S. Geological Survey Open-File Report.
- 542 **Ruhr, I. M., Takei, Y. and Grosell, M.** (2016). The role of the rectum in  
543 osmoregulation and the potential effect of renoguanlylin on SLC26a6 transport activity  
544 in the Gulf toadfish (*Opsanus beta*). *American journal of physiology. Regulatory,*  
545 *Integrative and Comparative Physiology* **311**, R179-91.



- 546           **Smith, H. W., Farinacci, N. and Breitweiser, A.** (1930). The absorption and  
547 excretion of water and salts by marine teleosts. *American Journal of Physiology* **93**, 480-  
548 505.
- 549           **Taylor, J. R., Mager, E. M. and Grosell, M.** (2010). Basolateral NBCe1 plays a  
550 rate-limiting role in transepithelial intestinal HCO<sub>3</sub><sup>-</sup> secretion, contributing to marine  
551 fish osmoregulation. *J Exp Biol* **213**, 459-68.
- 552           **Tresguerres, M., Levin, L. R., Buck, J. and Grosell, M.** (2010). Modulation of  
553 NaCl absorption by [HCO<sub>3</sub><sup>-</sup>] in the marine teleost intestine is mediated by soluble  
554 adenylyl cyclase. *Am J Physiol Regul Integr Comp Physiol* **299**, R62-71.
- 555           **Walsh, P. J., Blackwelder, P., Gill, K. A., Danulat, E. and Mommsen, T. P.**  
556 (1991). Carbonate Deposits in Marine Fish Intestines - a New Source of  
557 Biom mineralization. *Limnology and Oceanography* **36**, 1227-1232.
- 558           **Whittamore, J. M.** (2012). Osmoregulation and epithelial water transport:  
559 lessons from the intestine of marine teleost fish. *J Comp Physiol B* **182**, 1-39.
- 560           **Wilson, R., Gilmour, K., Henry, R. and Wood, C.** (1996). Intestinal base  
561 excretion in the seawater-adapted rainbow trout: a role in acid-base balance? *J Exp Biol*  
562 **199**, 2331-43.
- 563           **Wilson, R. W. and Grosell, M.** (2003). Intestinal bicarbonate secretion in marine  
564 teleost fish-source of bicarbonate, pH sensitivity, and consequences for whole animal  
565 acid-base and calcium homeostasis. *Biochim Biophys Acta* **1618**, 163-74.
- 566           **Wilson, R. W., Millero, F. J., Taylor, J. R., Walsh, P. J., Christensen, V., Jennings,**  
567 **S. and Grosell, M.** (2009). Contribution of fish to the marine inorganic carbon cycle.  
568 *Science* **323**, 359-62.
- 569           **Wilson, R. W., Wilson, J. M. and Grosell, M.** (2002). Intestinal bicarbonate  
570 secretion by marine teleost fish--why and how? *Biochim Biophys Acta* **1566**, 182-93.
- 571           **Wood, C. M. and Grosell, M.** (2012). Independence of net water flux from  
572 paracellular permeability in the intestine of *Fundulus heteroclitus*, a euryhaline teleost. *J*  
573 *Exp Biol* **215**, 508-17.
- 574           **Zeebe, R. E., Zachos, J. C., Caldeira, K. and Tyrrell, T.** (2008). Oceans. Carbon  
575 emissions and acidification. *Science* **321**, 51-2.
- 576
- 577

578 **Table 1** - Chemical conditions of seawater where sea bream were kept under  
 579 different CO<sub>2</sub> concentrations over a three month period.

580

|                                             | 400 µatm CO <sub>2</sub> | 800 µatm CO <sub>2</sub> | 1200 µatm CO <sub>2</sub> |
|---------------------------------------------|--------------------------|--------------------------|---------------------------|
| <b>pH</b>                                   | 8.01 ± 0.01              | 7.80 ± 0.01              | 7.64 ± 0.01               |
| <b>pCO<sub>2</sub> (µatm)</b>               | 408 ± 20                 | 797 ± 29                 | 1259 ± 46                 |
| <b>Salinity (ppt)</b>                       | 37.5 ± 0.0               | 37.5 ± 0.0               | 37.5 ± 0.0                |
| <b>Alkalinity (µMol kg<sup>-1</sup> SW)</b> | 2605 ± 10                | 2582 ± 25                | 2585 ± 14                 |
| <b>T (°C)</b>                               | 25.4 ± 0.2               | 25.5 ± 0.2               | 25.6 ± 0.2                |

581

582

583 **Table 2** – Osmolality, Na<sup>+</sup> and Cl<sup>-</sup> levels in plasma of sea bream acclimated for 3  
 584 months to different CO<sub>2</sub> concentration (400, 800 and 1200 µatm) at 37 ppt. Values  
 585 are means ± s.e.m. (N=11-19). No differences were described between any of the  
 586 experimental groups (p>0.05, one-way ANOVA).

587

|                                             | 400 µatm CO <sub>2</sub> | 800 µatm CO <sub>2</sub> | 1200 µatm CO <sub>2</sub> |
|---------------------------------------------|--------------------------|--------------------------|---------------------------|
| <b>Osmolality (mOsm kg<sup>-1</sup>)</b>    | 342 ± 2                  | 343 ± 2                  | 346 ± 2                   |
| <b>Na<sup>+</sup> (mmol L<sup>-1</sup>)</b> | 178.7 ± 2.3              | 183.4 ± 2.6              | 186.2 ± 2.1               |
| <b>Cl<sup>-</sup> (mmol L<sup>-1</sup>)</b> | 163.5 ± 1.3              | 165.2 ± 1.1              | 164.6 ± 1.3               |

588

589

590 **Table 3** - Osmolality, Na<sup>+</sup>, Ca<sup>2+</sup> and Mg<sup>2+</sup> levels in intestinal fluid of sea bream  
 591 acclimated for 3 months to different CO<sub>2</sub> concentration (400, 800 and 1200 µatm) at  
 592 37 ppt. Values are means ± s.e.m. (N=8-18). Different letters indicate significant  
 593 differences among groups (p<0.05, one-way ANOVA).

594

|                                              | 400 µatm CO <sub>2</sub> | 800 µatm CO <sub>2</sub> | 1200 µatm CO <sub>2</sub> |
|----------------------------------------------|--------------------------|--------------------------|---------------------------|
| <b>Osmolality (mOsm kg<sup>-1</sup>)</b>     | 353 ± 8                  | 355 ± 7                  | 359 ± 9                   |
| <b>Na<sup>+</sup>(mmol L<sup>-1</sup>)</b>   | 77.0 ± 2.4               | 72.1 ± 4.3               | 81.8 ± 5.0                |
| <b>Ca<sup>2+</sup> (mmol L<sup>-1</sup>)</b> | 9.5 ± 0.6                | 10.3 ± 0.6               | 8.6 ± 0.5                 |
| <b>Mg<sup>2+</sup> (mmol L<sup>-1</sup>)</b> | 123.2 ± 4.3 <sup>a</sup> | 143.9 ± 7.8 <sup>b</sup> | 143.8 ± 6.5 <sup>b</sup>  |

595

596

597 **Table 4** - Details of primers used for qPCR.

| Gene                      | Primer  | Sequence (5' to 3')      | T <sub>m</sub><br>(°C) | Product<br>size<br>(bp) | NCBI<br>accession<br>no. |
|---------------------------|---------|--------------------------|------------------------|-------------------------|--------------------------|
| <b><i>Slc26a3</i></b>     | Forward | ATCTCGGCTCTGAAGGGACT     | 60                     | 107                     | AM973894                 |
|                           | Reverse | AGCGAGCA TTTCTGTCCCTGCTC |                        |                         |                          |
| <b><i>Slc26a6</i></b>     | Forward | GCGGGACTGTTCAGCGGAGG     | 60                     | 153                     | FM155691.1               |
|                           | Reverse | TGCGAACACGCCTGAACGGCA    |                        |                         |                          |
| <b><i>Slc4a4</i></b>      | Forward | ACCTTCA TGCCACCGCAGGG    | 60                     | 101                     | FM157528.1               |
|                           | Reverse | CGCCGCGCCGATAACTCTT      |                        |                         |                          |
| <b><i>NKCC2</i></b>       | Forward | ACGGAGTCCAAGAAAACCACGGG  | 60                     | 128                     | FP335045                 |
|                           | Reverse | CCAGCCAGGATTCCGGTCGC     |                        |                         |                          |
| <b><i>Aquaporin1a</i></b> | Forward | GGCTCTCACGTACGATTTCC     | 60                     | 158                     | AY626939                 |
|                           | Reverse | TCTGTGTGGGACTATTTTGACG   |                        |                         |                          |
| <b><i>18S</i></b>         | Forward | AACCAGACAAATCGCTCCAC     | 60                     | 139                     | AY993930                 |
|                           | Reverse | CCTGCGGCTTAATTTGACTC     |                        |                         |                          |

598

599 **FIGURE LEGENDS**

600 **Figure 1.** Characterization of  $\text{Cl}^-$ ,  $\text{HCO}_3^-$  content in intestinal fluid and  $\text{Ca}(\text{Mg})\text{CO}_3$   
601 aggregates and total carbonate in intestinal lumen of sea bream in response to  
602 different environmental  $\text{CO}_2$  levels (400, 800 and 1200  $\mu\text{atm CO}_2$ ) for up to three  
603 months. Each bar represents the mean  $\pm$  s.e.m. (N= 7 - 9). Different superscript  
604 letters indicate significant differences ( $p < 0.05$ , one-way ANOVA followed by  
605 Bonferroni *post hoc* test).

606

607 **Figure 2.** Bicarbonate secretion (BCS) and tissue resistance ( $R_t$ ) measured in  
608 Ussing chambers by pH-Stat from anterior intestinal regions of sea bream in  
609 response to different environmental  $\text{CO}_2$  concentrations (400, 800 and 1200  $\mu\text{atm}$   
610  $\text{CO}_2$ ) for up to three months. Each bar represents the mean  $\pm$  s.e.m (N= 5 - 7).  
611 Different superscript letters indicate significant differences ( $p < 0.05$ , one-way ANOVA  
612 followed by Bonferroni *post hoc* test).

613

614 **Figure 3.** Relative expression (fold change of gene expression using *18S* as the  
615 housekeeping gene) of *Slc4a4*, *Slc26a3*, *Slc26a6* in the anterior intestine of sea  
616 bream in response to different environmental  $\text{CO}_2$  concentrations (400, 800 and  
617 1200  $\mu\text{atm CO}_2$ ) for up to three months. Each bar represents the mean  $\pm$  s.e.m (N=  
618 9 - 10). Different superscript letters indicate significant differences ( $p < 0.05$ , one-way  
619 ANOVA followed by Bonferroni *post hoc* test).

620

621 **Figure 4.** Comparative analysis of fold change of gene expression in sea bream  
622 juveniles using qPCR of *NKCC2* and *Aquaporin 1b* in the anterior intestine of sea  
623 bream in response to different  $\text{CO}_2$  concentrations (400, 800 and 1200  $\mu\text{atm CO}_2$ )  
624 for up to three months. Each bar represents the mean  $\pm$  s.e.m (N= 8 - 11). Different  
625 superscript letters indicate significant differences ( $p < 0.05$ , one-way ANOVA followed  
626 by Bonferroni *post hoc* test).

627

628

629 Figure 1 - Gregório et al.

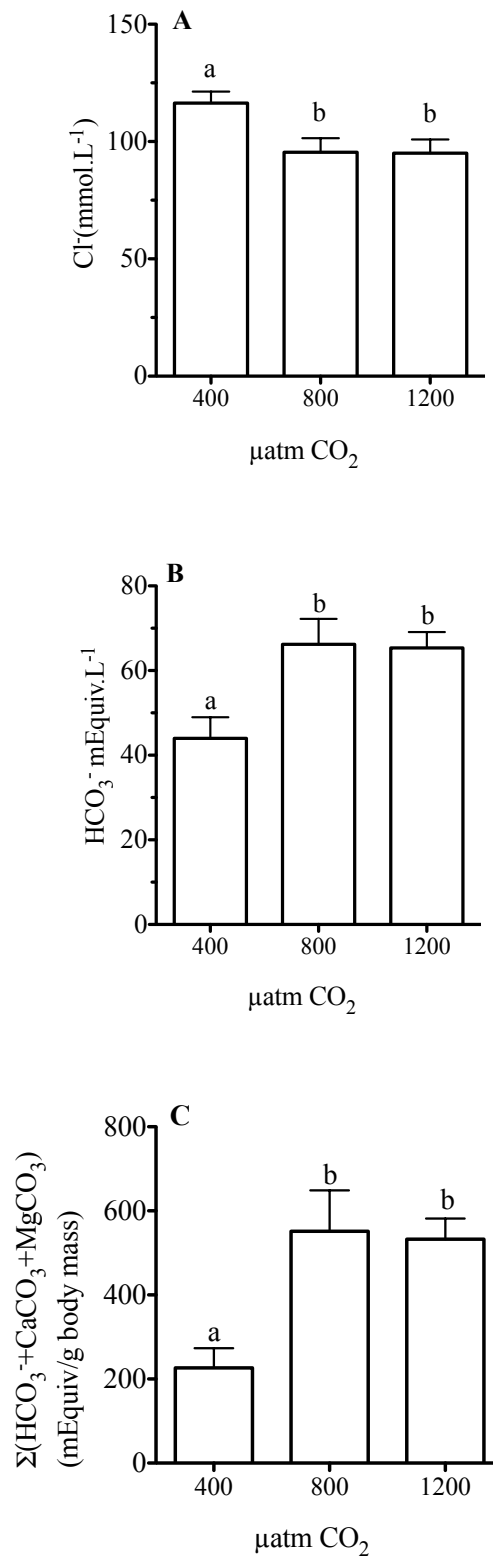

630

631

632 Figure 2 - Gregório et al.

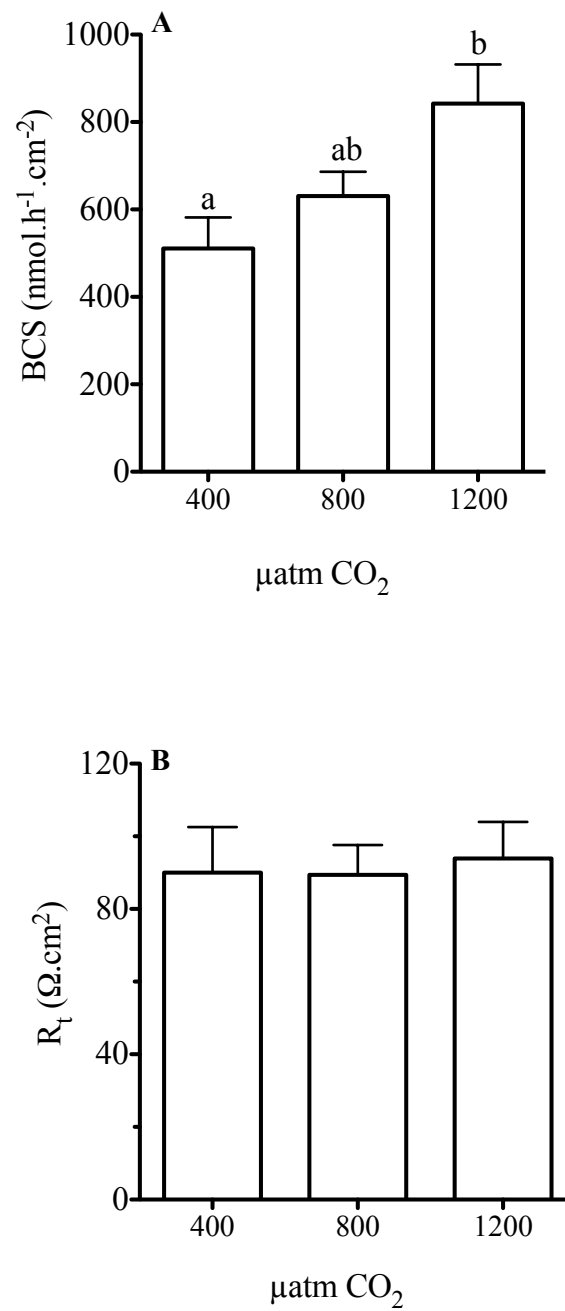

633

634 Figure 3 - Gregório et al.

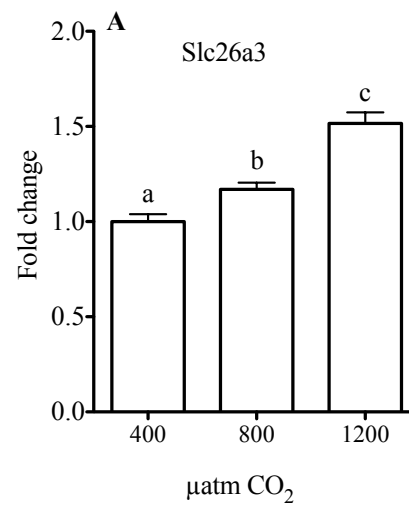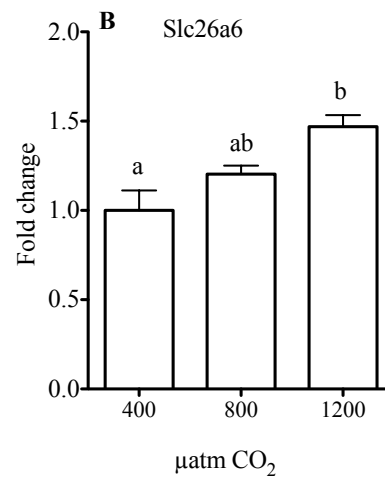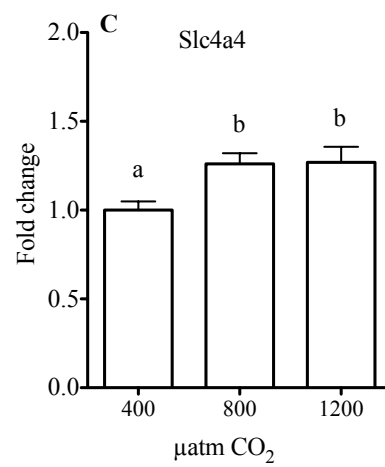

635

636 Figure 4 - Gregório et al.

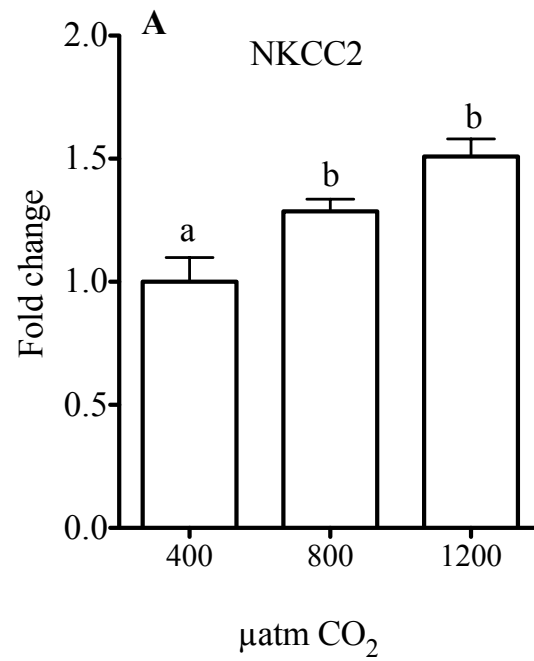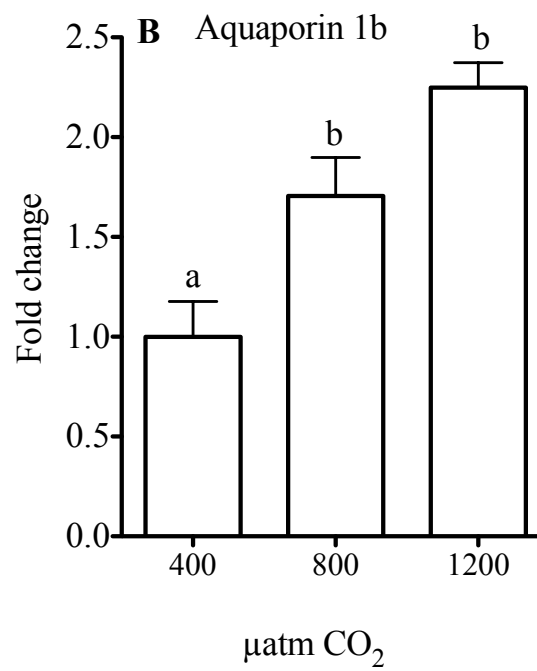

637
